# Supplementary material for: Prevalence and Predictors of Emotional Eating among Healthy Young Saudi Women during the COVID-19 Pandemic
Source: MDPI journal article supplement (doi:10.3390/nu12102923), 2020-09-24
Supplement: s1 [file s1]

## **Evaluating the healthy lifestyle for King Saud University during Covid-19 pandemic in Kingdom of Saudi Arabia**

Dear participants,

Thank you for agreeing to participate in this electronic survey, which consider a part of a research done by a research team from King Saud University.

The purpose of this survey is to evaluate your healthy lifestyle, like your physical activity, and your sleep during the current conditions due to Covid-19 pandemic. As well as, to evaluate your psychological status during this conditions by using a depression and anxiety indexes, and to evaluate your emotional eating status. Participation is available for King Saud University students.

As a participant, you will get:

- Degree of anxiety and depression
- Emotional eating status

Please, write your email so the research team can inform you about your degree.  
Your answers will help you a lot in controlling quantity and quality of your food.

All questions will depend on the period of quarantine.

Assure that your answers will be kept strictly confidential and only used for research purpose.  
If you agree in participating with this survey, please click “next” to start.

# تقييم أسلوب صحة الحياة لدى طلاب جامعة الملك سعود أثناء جائحة كورونا المستجد في المملكة العربية السعودية

عزيزي المشارك /عزيزتي المشاركة

شكرا على موافقتكم على المشاركة في هذا الاستبيان الإلكتروني الذي هو جزء من أبحاث يقوم بها فريق بحثي من جامعة الملك سعود. الهدف هو تقييم أسلوب صحة حياتك مثل نشاطك و نومك في هذه الظروف الراهنة بسبب وباء كورونا. كذلك تقييم وضعك النفسي في هذه الظروف من خلال مؤشر الاكتئاب والقلق العام بالإضافة لتقييم مستوى الشراهة في الأكل. المشاركة متاحة لطلاب و طالبات جامعة الملك سعود

كمشترك/ة في البحث، ستحصل على نتائج:

-درجة القلق والاكتئاب.

- ما إذا كان عواطفك تؤثر على طعامك؟ "لا تجعل نفسك تتحكم بكمية و نوع طعامك".

أرجو وضع ايميلك ليقوم الفريق البحثي بإبلاغك بنتيجة الإجابة باذن الله.

هذه الأجوبة ستساعدك كثيرا في التحكم بكمية و نوع طعامك.

دقة و مصداقية إجابتك عنصر مهم لنجاح البحث. سيستغرق تعبئة هذا الاستبيان ٢٠ دقيقة من وقتك.

ومشاركتك معنا تعتبر صدقة جارية عن علمك إن شاء الله و خدمة لوطنك.

\*الأسئلة تعتمد جميعها خلال فترة العزل.

نؤكد لك أن جميع إجاباتك ستبقى في سرية تامة و لأغراض البحثية فقط.

إذا كنت موافق/ة على المشاركة في هذا الاستبيان الإلكتروني، أرجو النقر على "التالي" للبدء.

\* Required

1. هل أنت طالب/ة أو متخرج/ة جامعة الملك سعود ؟ \* Are you student/graduate from King Saud university?

Mark only one oval.

Yes

No

☐ نعم

☐ لا

2. هل أنت سعودي/ة الجنسية ؟ \* Are you Saudi ?

Mark only one oval.

Yes

No

☐ نعم

☐ لا

Untitled Section

3. \* هل عمرك ضمن 18-39 سنة ؟ Is your age within 18-39 years old?

Mark only one oval.

- ☐ نعم Yes  
☐ لا No

4. \* هل تم تشخيصك من قبل طبيب بأي من الآتي؟

Mark only one oval.

- ☐ لا أعاني من أي منها  
☐ مرض السكري و سكر الحمل  
☐ (مشاكل في الغدة الدرقية (نشاط او خمول  
☐ حامل/مرضعة  
☐ (أمراض الجهاز الهضمي (مثل القولون و غيره  
☐ مشاكل بالنوم او مشاكل نفسية مشخص من قبل طبيب و/أو تم أخذ الدواء للحالة  
☐ وجود بروتين في البول  
☐ الداء النشواني  
☐ التهاب المفاصل  
☐ تضخم اللوزتين أو اللحمية  
☐ سوء امتصاص  
☐ داء الانسداد الرئوي المزمن  
☐ أورام  
☐ (أمراض القلب المزمن ( مثل انسداد الشرايين و غيره  
☐ (أمراض الكلى المزمن (مثل غسيل الكلى، الحصوات و غيره  
☐ أنيميا (فقر الدم) مشخص من قبل طبيب و/أو تم أخذ الدواء للحالة  
☐ اضطراب عمليات الأيض  
☐ ارتفاع الدهون الثلاثية  
☐ ارتفاع ضغط الدم  
☐ ضعف تحمل الجلوكوز  
☐ هشاشة العظام  
☐ الربو

Have you ever been diagnosed by a physician with:

- None  
DM, GDM  
Hypo/hyperthyroidism  
Pregnant/lactating women  
Digestive system diseases  
Psychological or sleep disorders  
Proteinuria  
Amyloidosis  
Arthritis  
Enlarged tonsils or adenoids  
Malabsorption  
COPD  
Tumors  
Heart diseases  
Kidney diseases  
Anemia  
Metabolic syndrome  
Hyper triglycerides  
Hypertension  
Glucose intolerance  
Osteoporosis  
Asthma

البيانات الشخصية

5. الاسم \* Name

---

6. الايميل Email

---

7. رقم الجوال \* Mobile number

---

8. العمر \* Age

---

9. مكان الميلاد \* Birth place

---

10. تاريخ الميلاد ( بالميلادي ) ؛ السنة/اليوم/الشهر \* Birth date

Example: January 7, 2019

11. الجنس \* Gender

Mark only one oval.

☐ ذكر

☐ أنثى

Male  
female

التاريخ المرضي الشخصي Personal medical history

12. عمر البلوغ \* Puberty age

---

13. إذا كنت أنثى، هل الدورة الشهرية

If female, is your menstrual cycle

Mark only one oval.

- ☐ منتظمة  
☐ غير منتظمة

Regular  
Irregular

التاريخ المرضي العائلي

Family medical history

14. \* هل يوجد هذه الأمراض في الوالد أو الوالدة أو الجد أو الجدة ؟

Do your parents or grandparents have one of these diseases

Mark only one oval per row.

|                        | نعم                   | Yes. | لا                    | No |
|------------------------|-----------------------|------|-----------------------|----|
| ارتفاع ضغط الدم        | <input type="radio"/> |      | <input type="radio"/> |    |
| ارتفاع الدهون الثلاثية | <input type="radio"/> |      | <input type="radio"/> |    |
| أمراض القلب            | <input type="radio"/> |      | <input type="radio"/> |    |
| هشاشة العظام           | <input type="radio"/> |      | <input type="radio"/> |    |
| الربو                  | <input type="radio"/> |      | <input type="radio"/> |    |
| السرطان                | <input type="radio"/> |      | <input type="radio"/> |    |
| أمراض الكبد            | <input type="radio"/> |      | <input type="radio"/> |    |
| أمراض الكلى            | <input type="radio"/> |      | <input type="radio"/> |    |

Hypertension

Hyper triglycerides

Heart diseases

Osteoporosis

Asthma

Cancer

Liver diseases

Kidney diseases

15. في حال وجود أمراض غير ذلك الرجاء ذكرها

In case there were other diseases, please mention them

16. DM \* السكري ؛ بإمكانك الخيار أكثر من شخص

Check all that apply.

- |                                     |                |
|-------------------------------------|----------------|
| <input type="checkbox"/> لا يوجد    |                |
| <input type="checkbox"/> الأم       | None           |
| <input type="checkbox"/> الأب       | Mother         |
| <input type="checkbox"/> الأخ/الأخت | Father         |
| <input type="checkbox"/> الأولاد    | Brother/sister |
| <input type="checkbox"/> جد/جدة     | Children       |
| <input type="checkbox"/> عم/عمة     | Grandparents   |
| <input type="checkbox"/> خال/خاله   | Uncle          |
|                                     | Aunt           |

17. \* سكر الحمل ؛ بإمكانك الخيار أكثر من شخص GDM

Check all that apply.

- |                                  |                |
|----------------------------------|----------------|
| <input type="checkbox"/> لا يوجد |                |
| <input type="checkbox"/> الأم    | None           |
| <input type="checkbox"/> الأب    | Mother         |
| <input type="checkbox"/> الأخت   | Father         |
| <input type="checkbox"/> الابنة  | Brother/sister |
| <input type="checkbox"/> جدة     | Children       |
| <input type="checkbox"/> عمه     | Grandparents   |
| <input type="checkbox"/> خالة    | Uncle          |
|                                  | Aunt           |

18. \* السمنة ؛ بإمكانك الخيار أكثر من شخص Obesity

Check all that apply.

- |                                     |                |
|-------------------------------------|----------------|
| <input type="checkbox"/> لا يوجد    |                |
| <input type="checkbox"/> الأم       | None           |
| <input type="checkbox"/> الأب       | Mother         |
| <input type="checkbox"/> الأخ/الأخت | Father         |
| <input type="checkbox"/> الأولاد    | Brother/sister |
| <input type="checkbox"/> جد/جدة     | Children       |
| <input type="checkbox"/> عم/عمة     | Grandparents   |
| <input type="checkbox"/> خال/خاله   | Uncle          |
|                                     | Aunt           |

البيانات الاجتماعية الديموغرافية

Socio-demographic information

19. \* القسم-1 Department

Mark only one oval.

- |                              |          |
|------------------------------|----------|
| <input type="radio"/> صحي    | Health   |
| <input type="radio"/> علمي   | Science  |
| <input type="radio"/> إنساني | Humanity |

20. \* (other) الكلية؛ إذا كانت الإجابة أخرى الرجاء كتابة الكلية في خانة-2

College

Mark only one oval.

- |                                                                             |                                                                    |
|-----------------------------------------------------------------------------|--------------------------------------------------------------------|
| <input type="radio"/> كلية الآداب                                           | College of arts                                                    |
| <input type="radio"/> كلية التربية                                          | College of education                                               |
| <input type="radio"/> كلية إدارة الأعمال                                    | College of Business Administration                                 |
| <input type="radio"/> كلية اللغات و الترجمة                                 | College of Languages and Translation                               |
| <input type="radio"/> كلية العلوم                                           | College of Science                                                 |
| <input type="radio"/> كلية علوم الحاسب و المعلومات                          | College of Computer and Information Sciences                       |
| <input type="radio"/> كلية الحقوق و العلوم السياسية و كلية السياحة و الآثار | College of Law, Political Sciences, Tourism and Archeology         |
| <input type="radio"/> كلية الصيدلة                                          | College of Pharmacy                                                |
| <input type="radio"/> كلية طب الأسنان                                       | College of Dentistry                                               |
| <input type="radio"/> كلية العلوم الطبية التطبيقية                          | College of Applied Medical Sciences                                |
| <input type="radio"/> كلية الطب                                             | College of Medicine                                                |
| <input type="radio"/> كلية التمريض                                          | College of Nursing                                                 |
| <input type="radio"/> كلية علوم الرياضة و النشاط البدني                     | College of Sport Sciences and Physical Activity                    |
| <input type="radio"/> كلية علوم الأغذية و الزراعة                           | College of Food and Agricultural Sciences                          |
| <input type="radio"/> كلية الهندسة                                          | College of Engineering                                             |
| <input type="radio"/> كلية العمارة و التخطيط                                | College of Architecture and Planning                               |
| <input type="radio"/> كلية المجتمع                                          | Community College                                                  |
| <input type="radio"/> كلية الدراسات التطبيقية و خدمة المجتمع                | College of Applied Studies and Community Services                  |
| <input type="radio"/> كلية الأمير سلطان بن عبدالعزيز للخدمات الطبية الطارئة | Prince Sultan Bin Abdulaziz College for Emergency Medical Services |
| <input type="radio"/> Other: _____                                          |                                                                    |

21. المستوى التعليمي-3 \* Educational level

Mark only one oval.

- |                                            |                 |
|--------------------------------------------|-----------------|
| <input type="radio"/> طالب/ة بكالوريوس     | Bachelor degree |
| <input type="radio"/> تدريب ميداني/ امتياز | Internship      |
| <input type="radio"/> طالب/ة ماجستير       | Master level    |
| <input type="radio"/> طالب/ة دكتوراه       | PHD             |
| <input type="radio"/> متخرج/ة              | Graduated       |

If you were a student, specify your level

22. \* (إذا كنت طالب/ة أي مستوى ؟ وإذا كانت الإجابة (طالب/ة امتياز أو متخرج/ة) اختار (لا-4

Mark only one oval per row.

|                 | لا                    | 1                     | 2                     | 3                     | 4                     | 5                     | 6                     | 7                     | 8                     | 9                     |
|-----------------|-----------------------|-----------------------|-----------------------|-----------------------|-----------------------|-----------------------|-----------------------|-----------------------|-----------------------|-----------------------|
| المستوى الدراسي | <input type="radio"/> |

23. المعدل التراكمي-5 \* GPA

Mark only one oval.

- |                                         |                    |
|-----------------------------------------|--------------------|
| <input type="radio"/> وأقل 3            | Less than 3        |
| <input type="radio"/> أكثر من 3 إلى 3.5 | More than 3 to 3.5 |
| <input type="radio"/> أكثر من 3.5 إلى 4 | More than 3.5 to 4 |
| <input type="radio"/> أكثر من 4 إلى 4.5 | More than 4 to 4.5 |
| <input type="radio"/> أكثر من 4.5 إلى 5 | More than 4.5 to 5 |

24. \* الوظيفة-6 Job

Mark only one oval.

- |                                                              |                     |
|--------------------------------------------------------------|---------------------|
| <input type="radio"/> غير موظف/ة                             | Unemployed          |
| <input type="radio"/> موظف/ة في قطاع صحي                     | Health sector       |
| <input type="radio"/> (موظف/ة في قطاع حكومي) في جهة غير صحية | Governmental sector |
| <input type="radio"/> موظف/ة في قطاع خاص                     | Private sector      |
| <input type="radio"/> (رجل/سيدة أعمال) أعمال حرة             | Business man/woman  |



25. \* دخل الأسرة الشهري -7 Family income

Mark only one oval.

- |                                          |                    |
|------------------------------------------|--------------------|
| <input type="radio"/> ليس لدينا دخل      | No income          |
| <input type="radio"/> أقل من 5000 ريال   | Less than 5000 RS  |
| <input type="radio"/> 5000-10000 ريال    | 5000-10000 RS      |
| <input type="radio"/> 10000-20000 ريال   | 10000-20000 RS     |
| <input type="radio"/> أكثر من 20000 ريال | More than 20000 RS |

26. \* هل تغير دخل الأسرة خلال فترة العزل؟-8 Did the family income changed during quarantine

Mark only one oval.

- |                                      |               |
|--------------------------------------|---------------|
| <input type="radio"/> لم يتغير       | No change     |
| <input type="radio"/> نعم، زاد الدخل | Yes increased |
| <input type="radio"/> نعم، نقص الدخل | Yes decreased |

27. \* الحالة الاجتماعية-9 Marital status

Mark only one oval.

- |                                  |          |
|----------------------------------|----------|
| <input type="radio"/> متزوج/ة    | Married  |
| <input type="radio"/> مطلق/ة     | Divorced |
| <input type="radio"/> أرمل/ة     | Widower  |
| <input type="radio"/> أعزب/عزباء | Single   |

28. \* هل لديك أطفال ؟ -9A Do you have children

Mark only one oval.

- |                           |     |
|---------------------------|-----|
| <input type="radio"/> لا  | No  |
| <input type="radio"/> نعم | Yes |

29. \* (كم عدد أطفالك ؟ إذا كانت الإجابة (لا) اكتب 0-9B) If yes, how many?

---

30. \* (other) منطقة السكن؛ إذا كانت الإجابة أخرى الرجاء كتابة المنطقة في خانة-10

Mark only one oval.

Place of residence

☐ شمال الرياض

North of riyadh

☐ جنوب الرياض

South of riyadh

☐ شرق الرياض

East of riyadh

☐ غرب الرياض

West of riyadh

☐ وسط الرياض

Other

☐ Other: \_\_\_\_\_

31. \* (other) نوع السكن؛ إذا كانت الإجابة أخرى الرجاء كتابة السكن في خانة-11

Mark only one oval.

Type of resistance

☐ شقة

Department

☐ فيلا

Villa

☐ دور

Floor

☐ سكن الطلاب

Student housing

☐ سكن أعضاء هيئة التدريس

Faculty housing

☐ Other: \_\_\_\_\_

Other

32. \* هل يوجد مساحة خارجية في المنزل؟-12 Do you have outdoor

Mark only one oval.

☐ نعم

Yes

☐ لا

No

33. \* مجموع عدد أفراد الأسرة الذين يسكنون معك و أنت من ضمنهم مع العاملة المنزلية-13

Number of family members who live with you including housekeeper if present

\_\_\_\_\_

34. \* عدد الكبار و المراهقين 10 سنوات و أعلى و أنت من ضمنهم ما عدا العاملة المنزلية -13A

Of whom adults or teenagers ?

\_\_\_\_\_

35. \* (عدد الرضع و الأطفال 9 سنوات و أقل ؛ إذا كانت الإجابة (لا يوجد) اكتب (0- 13B)

Of whom children of less than 9 years old

---

36. \* (عدد عاملات المنزل ؛ إذا كانت الإجابة (لا يوجد) اكتب (0- 13C)

Of whom housekeepers

---

37. \* مكان الإقامة الحالية-15

Current place of resistance

Mark only one oval.

☐

المدينة

City  
Village

☐

القرى

بيانات عن الصحة العامة و الغذاء

Information about general health and nutrition

38. \* هل غيرت منطقة السكن منذ بدء الحجر الصحي؟-1

Did you change the place of residence since quarantine started

Mark only one oval.

☐

نعم

Yes

☐

لا

No

39. \* هل أصبت بالفيروس ؟-2

have you got infected by corona virus

Mark only one oval.

☐

نعم

Yes

☐

لا

No

40. \* هل أصاب أحد من القرابة الدرجة الأولى ؟-3

Has some of your first degree relatives got infected by corona virus

Mark only one oval.

☐

نعم

Yes

☐

لا

No

41. \* من الذي أصاب من القرابة الدرجة الأولى؟ بإمكانك الخيار أكثر من شخص

Check all that apply.

If yes, specify

- |                                  |             |
|----------------------------------|-------------|
| <input type="checkbox"/> لا يوجد | None        |
| <input type="checkbox"/> جد      | Grandfather |
| <input type="checkbox"/> جدة     | Grandmother |
| <input type="checkbox"/> أب      | Father      |
| <input type="checkbox"/> أم      | Mother      |
| <input type="checkbox"/> أخت     | Sister      |
| <input type="checkbox"/> أخ      | Brother     |
| <input type="checkbox"/> عم      | Uncle       |
| <input type="checkbox"/> عمّة    | Aunt        |
| <input type="checkbox"/> خال     |             |
| <input type="checkbox"/> خالة    |             |

42. \* نوعية العزل-4

Mark only one oval.

Quarantine type

- |                                                                     |                  |
|---------------------------------------------------------------------|------------------|
| <input type="radio"/> (عزل صحي) في أحد ضيافات وزارة الصحة أو مستشفى | Health isolation |
| <input type="radio"/> عزل منزلي                                     | Self-quarantine  |

43. \* منذ متى مدة العزل-5

Mark only one oval.

Quarantine period

- |                                         |                                  |
|-----------------------------------------|----------------------------------|
| <input type="radio"/> أول خبر عن كورونا | Since covid-19 started           |
| <input type="radio"/> العزل الجزئي      | Since partial quarantine started |
| <input type="radio"/> العزل الكامل      | Since full quarantine started    |

44. \* الوزن الحالي (كجم) -6a

Current weight in Kg

---

45. \* كم طولك؟ (سم) -6b

Height in cm

---

46. \* كيف تصف وزنك الحالي مقارنة بما قبل العزل؟-7

How you describe your current weight in compare with to your weight before quarantine

Mark only one oval.

- ☐ زاد الوزن  
☐ نقص الوزن  
☐ لم يتغير الوزن

Increase  
Decrease  
No change

47. \* هل تتبع أي حمية في الوقت الحالي (خلال فترة العزل)؟-8

Do you follow any diet currently (during quarantine period)

Mark only one oval.

- ☐ نعم  
☐ لا

Yes  
No

48. ما نوع الحمية؟ إذا كانت الإجابة (لا) اكتب (لا يوجد)

If yes, specify what kind of diet

\_\_\_\_\_

49. \* ( عدد الوجبات يوميا ) خلال فترة العزل-9

Number of daily meals during quarantine period

Mark only one oval per row.

|            | 0                     | 1                     | 2                     | 3                     | 4                     |
|------------|-----------------------|-----------------------|-----------------------|-----------------------|-----------------------|
| Main meals | <input type="radio"/> |
| Snacks     | <input type="radio"/> |

50. \* خلال الشهور الثلاث الماضية ( خلال فترة العزل ) هل أخذت مكملات غذائية مثل الفيتامينات أو المعادن؟-10

Check all that apply. During the last 3 months (during quarantine period), did you take any supplements

☐ لا

☐ مكمل غذائي/بروتينات Formula/protein supplements or bars

☐ فيتامينات متنوعة Multivitamin

☐ فيتامين د Vitamin D

☐ فيتامين سي Vitamin C

☐ فيتامين ب12 Vitamin B12

☐ حمض الفوليك Folic acid

☐ الحديد Iron

☐ زيت كبد الحوت Cod liver oil

☐ others أخرى؛ الرجاء ذكرها في خانة

Other: ☐ \_\_\_\_\_

51. إذا كانت الإجابة بنعم، ما هو نوع المكمل الغذائي ( بما في ذلك من الاسم/العلامة التجارية) و كم الكمية المستهلكة في الغالب؟

If yes, what kind of supplement (name/ trademark), and specify the consumed quantity

---

---

---

---

---

52. \* تناول الفيتامينات أو المعادن

Consuming supplement

Mark only one oval.

☐ لا أتناول

☐ منتظم/ة

☐ غير منتظم/ة

No

Regularly

Irregularly

53. \* مكان تناول الطعام؛ بإمكانك الخيار أكثر من مكان-11 Place of eating

Check all that apply.

☐ طاولة الطعام

Dining table

☐ المطبخ

Kitchen

☐ غرفة المعيشة

Living room

☐ غرفة النوم

Bedroom

☐ أخرى (other) الرجاء كتابة المكان في خانة أخرى

Other, specify

Other: ☐ \_\_\_\_\_

54. \* هل تطبخ؟-a-12 Do you cook

Mark only one oval.

☐ نعم

Yes

☐ لا

No

55. \* من يقوم بمهام الطبخ؟ بإمكانك الخيار أكثر من شخص-b-12 Who is in charge of cooking

Check all that apply.

☐ أنت

You

☐ الأم

Mother

☐ الأخت

Sister

☐ العاملة المنزلية

Housekeepers

☐ أخرى (other) الرجاء كتابة الشخص في خانة أخرى

Other, specify

Other: ☐ \_\_\_\_\_

56. \* هل تطلب من المطاعم ( خلال فترة العزل ) ؟-13

Mark only one oval.

Do you order from restaurants during quarantine period

☐ نعم

Yes

☐ لا

No

57. \* إن كانت طلباتك من المطاعم قد قلت عن قبل العزل، فما هو السبب؟ بإمكانك الخيار أكثر من مرة-14

Check all that apply.

If your eating from restaurants have been decreased in comparison to before quarantine, what would be the reason

☐ الخوف من عدوى الكورونا

Fear from coronal virus

☐ ضيق الوقت بسبب حظر التجول

Time limits due to quarantine

☐ لم تقل الطلبات عن السابق

No change

58. \* ما هو معدل استهلاكك للوجبات خارج المنزل سواء من مطاعم الوجبات السريعة أو غيرها ( خلال فترة العزل ) ؟-15

Mark only one oval per row.

How often do you eat from restaurants during quarantine

|                   | مرة باليوم            | 2-3 باليوم            | مرة بالأسبوع          | 2-4 بالأسبوع          | 5-6 بالأسبوع          | 1-3 بالشهر            | أقل من مرة بالشهر / بتاتا |
|-------------------|-----------------------|-----------------------|-----------------------|-----------------------|-----------------------|-----------------------|---------------------------|
| وجبات خارج المنزل | <input type="radio"/>     |

Once a day    2-3 time a day    Once a week    2-4 a week    5-6 a week    1-3 per month    les than once per month/never

59. \* هل أنت نباتي/ة ؟-16

Are you vegan

Mark only one oval.

☐ لا No

☐ لا يوجد منتجات اللحوم والألبان والبيض Vegan

☐ لا يوجد منتجات اللحوم والبيض Lacto vegetarian

☐ لا يوجد منتجات اللحوم والألبان Ovo vegetarian

☐ لا يوجد منتجات اللحوم فقط Lacto ovo vegetarian

☐ لا يوجد منتجات اللحوم ولكن يتناولون المأكولات البحرية Pescatarian

☐ Other: \_\_\_\_\_



60. 17-مستوى الشراهة للأغذية والمشروبات-17 \* Degree of craving to food and beverages

الأسئلة تعتمد جميعها خلال فترة العزل.

Mark only one oval per row.

|                                                                                                                     | Very often            | Often                 | Sometimes             | Almost never          | Never                 |
|---------------------------------------------------------------------------------------------------------------------|-----------------------|-----------------------|-----------------------|-----------------------|-----------------------|
|                                                                                                                     | أكثر بكثير            | أقل بكثير             | أحيانا                | شبه بتاتا             | بتاتا                 |
| مستوى الشهية للأغذية السكرية مثل (المثلجات، الكوكيز، الشكولاته) بالمقارنه بما قبل العزل؟<br>Carving to Sugary foods | <input type="radio"/> |
| أتناول الأغذية السكرية<br>Eating sugary foods                                                                       | <input type="radio"/> |
| أشرب القهوة<br>Drinking coffee                                                                                      | <input type="radio"/> |
| أشرب الشاي<br>Drinking tea                                                                                          | <input type="radio"/> |
| أتناول مشروبات تقوية المناعة و تعزيز الصحة (الكركم- زنجبيل-الليمون)<br>Immune boosting beverages                    | <input type="radio"/> |
| أتناول العسل<br>Consuming honey                                                                                     | <input type="radio"/> |

61. \*معدل استهلاك المشروبات - 21

الأسئلة تعتمد جميعها خلال فترة العزل

Mark only one oval per row.

[illegible]

62. 22- عدد مرات استهلاك المشروبات باليوم-22 \* How often do you consume these beverages per day  
الأسئلة تعتمد جميعها خلال فترة العزل.

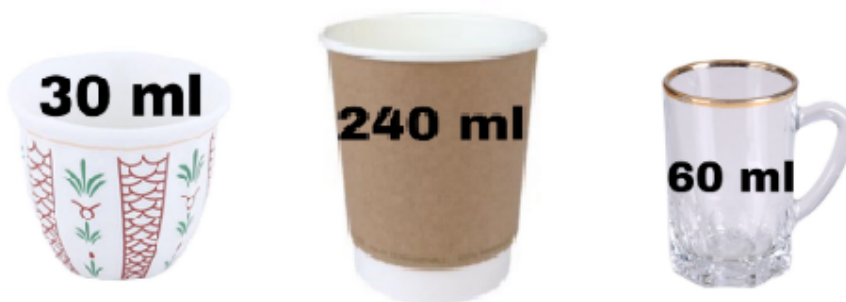

Mark only one oval per row.

|                            |                                                                                          | 0                     | 1                     | 2                     | 3                     | 4                     | 5 وأكثر               |
|----------------------------|------------------------------------------------------------------------------------------|-----------------------|-----------------------|-----------------------|-----------------------|-----------------------|-----------------------|
| Arabic coffee (Finjan)     | عدد فنجال/باليوم - القهوة العربية                                                        | <input type="radio"/> |
| Other kind of coffee (cup) | عدد أكواب/باليوم - أنواع أخرى من القهوة                                                  | <input type="radio"/> |
| Red tea (biallah)          | عدد بيالات/باليوم - الشاي الأحمر                                                         | <input type="radio"/> |
| Green tea (Biallah)        | عدد بيالات/باليوم - الشاي الأخضر                                                         | <input type="radio"/> |
| Herbals (Cup)              | عدد أكواب/باليوم - الأعشاب ( بابونج، يانسون، شمر، حبق، نعناع، زنجبيل، كمون، كركم وغيره ) | <input type="radio"/> |

63. 23- كم تستهلك من المياه يوميا (تقريبا) خلال فترة العزل؟-23 \* How often do you consume of water

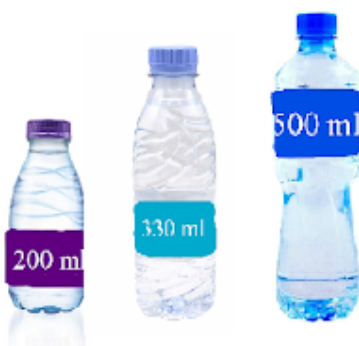

Mark only one oval.

- |                                         |                   |
|-----------------------------------------|-------------------|
| <input type="radio"/> أقل من 500 مل     | Less than 500 ml  |
| <input type="radio"/> 1000 مل - 1500 مل | 1000-1500 ml      |
| <input type="radio"/> 1600 مل - 2000 مل | 1600-2000 ml      |
| <input type="radio"/> أكثر من 2000 مل   | More than 2000 ml |
| <input type="radio"/> أكثر من 2500 مل   | More than 2500 ml |

64. \* هل أنت مدخن/ة ( سجائر، شيشة، سجائر الكترونية و غيرها من الأنواع ) ؟-24

Are you smoker?

Mark only one oval.

☐ نعم

Yes

☐ لا

No

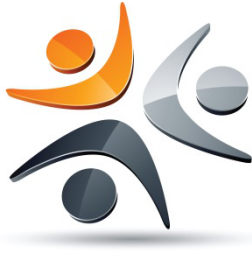

## Emotional Eating Scale

We all respond to different emotions in different ways. Some types of feelings lead people to experience an urge to eat. Use the form below to identify the extent to which the following feelings lead you to feel an urge to eat, by ticking the appropriate box.

|             | No desire to eat | A small desire to eat | A moderate desire to eat | A strong urge to eat | An over-whelming urge to eat |
|-------------|------------------|-----------------------|--------------------------|----------------------|------------------------------|
| Resentful   |                  |                       |                          |                      |                              |
| Discouraged |                  |                       |                          |                      |                              |
| Shaky       |                  |                       |                          |                      |                              |
| Worn out    |                  |                       |                          |                      |                              |
| Inadequate  |                  |                       |                          |                      |                              |
| Excited     |                  |                       |                          |                      |                              |
| Rebellious  |                  |                       |                          |                      |                              |
| Down        |                  |                       |                          |                      |                              |
| Jittery     |                  |                       |                          |                      |                              |
| Sad         |                  |                       |                          |                      |                              |
| Uneasy      |                  |                       |                          |                      |                              |
| Irritated   |                  |                       |                          |                      |                              |
| Jealous     |                  |                       |                          |                      |                              |
| Worried     |                  |                       |                          |                      |                              |

|                   |  |  |  |  |  |
|-------------------|--|--|--|--|--|
| <b>Frustrated</b> |  |  |  |  |  |
| <b>Lonely</b>     |  |  |  |  |  |
| <b>Furious</b>    |  |  |  |  |  |
| <b>On edge</b>    |  |  |  |  |  |
| <b>Confused</b>   |  |  |  |  |  |
| <b>Nervous</b>    |  |  |  |  |  |
| <b>Angry</b>      |  |  |  |  |  |
| <b>Guilty</b>     |  |  |  |  |  |
| <b>Bored</b>      |  |  |  |  |  |
| <b>Helpless</b>   |  |  |  |  |  |
| <b>Upset</b>      |  |  |  |  |  |

## Perceived Stress Scale

The questions in this scale ask you about your feelings and thoughts **during the last month**. In each case, you will be asked to indicate by circling *how often* you felt or thought a certain way.

Name \_\_\_\_\_ Date \_\_\_\_\_

Age \_\_\_\_\_ Gender (*Circle*): **M** **F** Other \_\_\_\_\_

**0 = Never    1 = Almost Never    2 = Sometimes    3 = Fairly Often    4 = Very Often**

- |                                                                                                                            |   |   |   |   |   |
|----------------------------------------------------------------------------------------------------------------------------|---|---|---|---|---|
| 1. In the last month, how often have you been upset because of something that happened unexpectedly? .....                 | 0 | 1 | 2 | 3 | 4 |
| 2. In the last month, how often have you felt that you were unable to control the important things in your life? .....     | 0 | 1 | 2 | 3 | 4 |
| 3. In the last month, how often have you felt nervous and "stressed"? .....                                                | 0 | 1 | 2 | 3 | 4 |
| 4. In the last month, how often have you felt confident about your ability to handle your personal problems? .....         | 0 | 1 | 2 | 3 | 4 |
| 5. In the last month, how often have you felt that things were going your way?.....                                        | 0 | 1 | 2 | 3 | 4 |
| 6. In the last month, how often have you found that you could not cope with all the things that you had to do? .....       | 0 | 1 | 2 | 3 | 4 |
| 7. In the last month, how often have you been able to control irritations in your life? .....                              | 0 | 1 | 2 | 3 | 4 |
| 8. In the last month, how often have you felt that you were on top of things?..                                            | 0 | 1 | 2 | 3 | 4 |
| 9. In the last month, how often have you been angered because of things that were outside of your control? .....           | 0 | 1 | 2 | 3 | 4 |
| 10. In the last month, how often have you felt difficulties were piling up so high that you could not overcome them? ..... | 0 | 1 | 2 | 3 | 4 |

## Patient Health Questionnaire (PHQ-9)

**Patient Name:** \_\_\_\_\_

**Date:** \_\_\_\_\_

|                                                                                                                                                                                                 | Not at all               | Several days             | More than<br>half the days | Nearly every<br>day      |
|-------------------------------------------------------------------------------------------------------------------------------------------------------------------------------------------------|--------------------------|--------------------------|----------------------------|--------------------------|
| 1. Over the <i>last 2 weeks</i> , how often have you been bothered by any of the following problems?                                                                                            |                          |                          |                            |                          |
| a. Little interest or pleasure in doing things                                                                                                                                                  | <input type="checkbox"/> | <input type="checkbox"/> | <input type="checkbox"/>   | <input type="checkbox"/> |
| b. Feeling down, depressed, or hopeless                                                                                                                                                         | <input type="checkbox"/> | <input type="checkbox"/> | <input type="checkbox"/>   | <input type="checkbox"/> |
| c. Trouble falling/staying asleep, sleeping too much                                                                                                                                            | <input type="checkbox"/> | <input type="checkbox"/> | <input type="checkbox"/>   | <input type="checkbox"/> |
| d. Feeling tired or having little energy                                                                                                                                                        | <input type="checkbox"/> | <input type="checkbox"/> | <input type="checkbox"/>   | <input type="checkbox"/> |
| e. Poor appetite or overeating                                                                                                                                                                  | <input type="checkbox"/> | <input type="checkbox"/> | <input type="checkbox"/>   | <input type="checkbox"/> |
| f. Feeling bad about yourself or that you are a failure or have let yourself or your family down                                                                                                | <input type="checkbox"/> | <input type="checkbox"/> | <input type="checkbox"/>   | <input type="checkbox"/> |
| g. Trouble concentrating on things, such as reading the newspaper or watching television.                                                                                                       | <input type="checkbox"/> | <input type="checkbox"/> | <input type="checkbox"/>   | <input type="checkbox"/> |
| h. Moving or speaking so slowly that other people could have noticed. Or the opposite; being so fidgety or restless that you have been moving around a lot more than usual.                     | <input type="checkbox"/> | <input type="checkbox"/> | <input type="checkbox"/>   | <input type="checkbox"/> |
| i. Thoughts that you would be better off dead or of hurting yourself in some way.                                                                                                               | <input type="checkbox"/> | <input type="checkbox"/> | <input type="checkbox"/>   | <input type="checkbox"/> |
| 2. If you checked off any problem on this questionnaire so far, how difficult have these problems made it for you to do your work, take care of things at home, or get along with other people? |                          |                          |                            |                          |
|                                                                                                                                                                                                 | Not difficult<br>at all  | Somewhat<br>difficult    | Very<br>difficult          | Extremely<br>difficult   |
|                                                                                                                                                                                                 | <input type="checkbox"/> | <input type="checkbox"/> | <input type="checkbox"/>   | <input type="checkbox"/> |



## Generalized Anxiety Disorder 7-item (GAD-7) scale

| Over the last 2 weeks, how often have you been bothered by the following problems? | Not at all sure | Several days | Over half the days | Nearly every day |
|------------------------------------------------------------------------------------|-----------------|--------------|--------------------|------------------|
| 1. Feeling nervous, anxious, or on edge                                            | 0               | 1            | 2                  | 3                |
| 2. Not being able to stop or control worrying                                      | 0               | 1            | 2                  | 3                |
| 3. Worrying too much about different things                                        | 0               | 1            | 2                  | 3                |
| 4. Trouble relaxing                                                                | 0               | 1            | 2                  | 3                |
| 5. Being so restless that it's hard to sit still                                   | 0               | 1            | 2                  | 3                |
| 6. Becoming easily annoyed or irritable                                            | 0               | 1            | 2                  | 3                |
| 7. Feeling afraid as if something awful might happen                               | 0               | 1            | 2                  | 3                |
| <i>Add the score for each column</i>                                               | +               | +            | +                  |                  |
| Total Score ( <i>add your column scores</i> ) =                                    |                 |              |                    |                  |

Name\_\_\_\_\_

Date\_\_\_\_\_

# Sleep Quality Assessment (PSQI)

## What is PSQI, and what is it measuring?

The Pittsburgh Sleep Quality Index (PSQI) is an effective instrument used to measure the quality and patterns of sleep in adults. It differentiates “poor” from “good” sleep quality by measuring seven areas (components): subjective sleep quality, sleep latency, sleep duration, habitual sleep efficiency, sleep disturbances, use of sleeping medications, and daytime dysfunction over the last month.

## INSTRUCTIONS:

The following questions relate to your usual sleep habits during the past month only. Your answers should indicate the most accurate reply for the majority of days and nights in the past month. Please answer all questions.

### During the past month,

1. When have you usually gone to bed?
2. How long (in minutes) has it taken you to fall asleep each night?
3. What time have you usually gotten up in the morning?
4. A. How many hours of actual sleep did you get at night?  
B. How many hours were you in bed?

---

---

---

---

---

|                                                                                                                                     |                               |                           |                          |                                |
|-------------------------------------------------------------------------------------------------------------------------------------|-------------------------------|---------------------------|--------------------------|--------------------------------|
| 5. During the past month, how often have you had trouble sleeping because you                                                       | Not during the past month (0) | Less than once a week (1) | Once or twice a week (2) | Three or more times a week (3) |
| A. Cannot get to sleep within 30 minutes                                                                                            |                               |                           |                          |                                |
| B. Wake up in the middle of the night or early morning                                                                              |                               |                           |                          |                                |
| C. Have to get up to use the bathroom                                                                                               |                               |                           |                          |                                |
| D. Cannot breathe comfortably                                                                                                       |                               |                           |                          |                                |
| E. Cough or snore loudly                                                                                                            |                               |                           |                          |                                |
| F. Feel too cold                                                                                                                    |                               |                           |                          |                                |
| G. Feel too hot                                                                                                                     |                               |                           |                          |                                |
| H. Have bad dreams                                                                                                                  |                               |                           |                          |                                |
| I. Have pain                                                                                                                        |                               |                           |                          |                                |
| J. Other reason (s), please describe, including how often you have had trouble sleeping because of this reason (s):                 |                               |                           |                          |                                |
| 6. During the past month, how often have you taken medicine (prescribed or “over the counter”) to help you sleep?                   |                               |                           |                          |                                |
| 7. During the past month, how often have you had trouble staying awake while driving, eating meals, or engaging in social activity? |                               |                           |                          |                                |
| 8. During the past month, how much of a problem has it been for you to keep up enthusiasm to get things done?                       |                               |                           |                          |                                |
| 9. During the past month, how would you rate your sleep quality overall?                                                            | Very good (0)                 | Fairly good (1)           | Fairly bad (2)           | Very bad (3)                   |

| Physical Activity                                                                                                                                                                                                                                                                                                                                                                                                                                                                                                                                                                                                                                                                                                                                                                                                                             |                                                                                                                                                                                                                                                                         |                                                                                                           |              |
|-----------------------------------------------------------------------------------------------------------------------------------------------------------------------------------------------------------------------------------------------------------------------------------------------------------------------------------------------------------------------------------------------------------------------------------------------------------------------------------------------------------------------------------------------------------------------------------------------------------------------------------------------------------------------------------------------------------------------------------------------------------------------------------------------------------------------------------------------|-------------------------------------------------------------------------------------------------------------------------------------------------------------------------------------------------------------------------------------------------------------------------|-----------------------------------------------------------------------------------------------------------|--------------|
| <p>Next I am going to ask you about the time you spend doing different types of physical activity in a typical week. Please answer these questions even if you do not consider yourself to be a physically active person.</p> <p>Think first about the time you spend doing work. Think of work as the things that you have to do such as paid or unpaid work, study/training, household chores, harvesting food/crops, fishing or hunting for food, seeking employment. <i>[Insert other examples if needed]</i>. In answering the following questions 'vigorous-intensity activities' are activities that require hard physical effort and cause large increases in breathing or heart rate, 'moderate-intensity activities' are activities that require moderate physical effort and cause small increases in breathing or heart rate.</p> |                                                                                                                                                                                                                                                                         |                                                                                                           |              |
| Questions                                                                                                                                                                                                                                                                                                                                                                                                                                                                                                                                                                                                                                                                                                                                                                                                                                     | Response                                                                                                                                                                                                                                                                |                                                                                                           | Code         |
| <b>Activity at work</b>                                                                                                                                                                                                                                                                                                                                                                                                                                                                                                                                                                                                                                                                                                                                                                                                                       |                                                                                                                                                                                                                                                                         |                                                                                                           |              |
| 1                                                                                                                                                                                                                                                                                                                                                                                                                                                                                                                                                                                                                                                                                                                                                                                                                                             | Does your work involve vigorous-intensity activity that causes large increases in breathing or heart rate like <i>[carrying or lifting heavy loads, digging or construction work]</i> for at least 10 minutes continuously?<br><i>[INSERT EXAMPLES] (USE SHOWCARD)</i>  | Yes 1<br><br>No 2 <i>If No, go to P 4</i>                                                                 | P1           |
| 2                                                                                                                                                                                                                                                                                                                                                                                                                                                                                                                                                                                                                                                                                                                                                                                                                                             | In a typical week, on how many days do you do vigorous-intensity activities as part of your work?                                                                                                                                                                       | Number of days <input type="text"/>                                                                       | P2           |
| 3                                                                                                                                                                                                                                                                                                                                                                                                                                                                                                                                                                                                                                                                                                                                                                                                                                             | How much time do you spend doing vigorous-intensity activities at work on a typical day?                                                                                                                                                                                | Hours : minutes <input type="text"/> : <input type="text"/><br>hrs                                   mins | P3<br>(a-b)  |
| 4                                                                                                                                                                                                                                                                                                                                                                                                                                                                                                                                                                                                                                                                                                                                                                                                                                             | Does your work involve moderate-intensity activity that causes small increases in breathing or heart rate such as brisk walking <i>[or carrying light loads]</i> for at least 10 minutes continuously?<br><i>[INSERT EXAMPLES] (USE SHOWCARD)</i>                       | Yes 1<br><br>No 2 <i>If No, go to P 7</i>                                                                 | P4           |
| 5                                                                                                                                                                                                                                                                                                                                                                                                                                                                                                                                                                                                                                                                                                                                                                                                                                             | In a typical week, on how many days do you do moderate-intensity activities as part of your work?                                                                                                                                                                       | Number of days <input type="text"/>                                                                       | P5           |
| 6                                                                                                                                                                                                                                                                                                                                                                                                                                                                                                                                                                                                                                                                                                                                                                                                                                             | How much time do you spend doing moderate-intensity activities at work on a typical day?                                                                                                                                                                                | Hours : minutes <input type="text"/> : <input type="text"/><br>hrs                                   mins | P6<br>(a-b)  |
| <b>Travel to and from places</b>                                                                                                                                                                                                                                                                                                                                                                                                                                                                                                                                                                                                                                                                                                                                                                                                              |                                                                                                                                                                                                                                                                         |                                                                                                           |              |
| <p>The next questions exclude the physical activities at work that you have already mentioned.</p> <p>Now I would like to ask you about the usual way you travel to and from places. For example to work, for shopping, to market, to place of worship. <i>[insert other examples if needed]</i></p>                                                                                                                                                                                                                                                                                                                                                                                                                                                                                                                                          |                                                                                                                                                                                                                                                                         |                                                                                                           |              |
| 7                                                                                                                                                                                                                                                                                                                                                                                                                                                                                                                                                                                                                                                                                                                                                                                                                                             | Do you walk or use a bicycle ( <i>pedal cycle</i> ) for at least 10 minutes continuously to get to and from places?                                                                                                                                                     | Yes 1<br><br>No 2 <i>If No, go to P 10</i>                                                                | P7           |
| 8                                                                                                                                                                                                                                                                                                                                                                                                                                                                                                                                                                                                                                                                                                                                                                                                                                             | In a typical week, on how many days do you walk or bicycle for at least 10 minutes continuously to get to and from places?                                                                                                                                              | Number of days <input type="text"/>                                                                       | P8           |
| 9                                                                                                                                                                                                                                                                                                                                                                                                                                                                                                                                                                                                                                                                                                                                                                                                                                             | How much time do you spend walking or bicycling for travel on a typical day?                                                                                                                                                                                            | Hours : minutes <input type="text"/> : <input type="text"/><br>hrs                                   mins | P9<br>(a-b)  |
| <b>Recreational activities</b>                                                                                                                                                                                                                                                                                                                                                                                                                                                                                                                                                                                                                                                                                                                                                                                                                |                                                                                                                                                                                                                                                                         |                                                                                                           |              |
| <p>The next questions exclude the work and transport activities that you have already mentioned.</p> <p>Now I would like to ask you about sports, fitness and recreational activities (<i>leisure</i>), <i>[insert relevant terms]</i>.</p>                                                                                                                                                                                                                                                                                                                                                                                                                                                                                                                                                                                                   |                                                                                                                                                                                                                                                                         |                                                                                                           |              |
| 10                                                                                                                                                                                                                                                                                                                                                                                                                                                                                                                                                                                                                                                                                                                                                                                                                                            | Do you do any vigorous-intensity sports, fitness or recreational ( <i>leisure</i> ) activities that cause large increases in breathing or heart rate like <i>[running or football]</i> for at least 10 minutes continuously?<br><i>[INSERT EXAMPLES] (USE SHOWCARD)</i> | Yes 1<br><br>No 2 <i>If No, go to P 13</i>                                                                | P10          |
| 11                                                                                                                                                                                                                                                                                                                                                                                                                                                                                                                                                                                                                                                                                                                                                                                                                                            | In a typical week, on how many days do you do vigorous-intensity sports, fitness or recreational ( <i>leisure</i> ) activities?                                                                                                                                         | Number of days <input type="text"/>                                                                       | P11          |
| 12                                                                                                                                                                                                                                                                                                                                                                                                                                                                                                                                                                                                                                                                                                                                                                                                                                            | How much time do you spend doing vigorous-intensity sports, fitness or recreational activities on a typical day?                                                                                                                                                        | Hours : minutes <input type="text"/> : <input type="text"/><br>hrs                                   mins | P12<br>(a-b) |

| Physical Activity (recreational activities) contd.                                                                                                                                                                                                                                                                                                  |                                                                                                                                                                                                                                                                                                         |                                                                                                             |              |
|-----------------------------------------------------------------------------------------------------------------------------------------------------------------------------------------------------------------------------------------------------------------------------------------------------------------------------------------------------|---------------------------------------------------------------------------------------------------------------------------------------------------------------------------------------------------------------------------------------------------------------------------------------------------------|-------------------------------------------------------------------------------------------------------------|--------------|
| Questions                                                                                                                                                                                                                                                                                                                                           |                                                                                                                                                                                                                                                                                                         | Response                                                                                                    | Code         |
| 13                                                                                                                                                                                                                                                                                                                                                  | Do you do any moderate-intensity sports, fitness or recreational ( <i>leisure</i> ) activities that causes a small increase in breathing or heart rate such as brisk walking, ( <i>cycling, swimming, volleyball</i> ) for at least 10 minutes continuously?<br><i>[INSERT EXAMPLES] (USE SHOWCARD)</i> | <p>Yes    1</p> <p>No    2    <i>If No, go to P16</i></p>                                                   | P13          |
| 14                                                                                                                                                                                                                                                                                                                                                  | In a typical week, on how many days do you do moderate-intensity sports, fitness or recreational ( <i>leisure</i> ) activities?                                                                                                                                                                         | Number of days <input type="text"/>                                                                         | P14          |
| 15                                                                                                                                                                                                                                                                                                                                                  | How much time do you spend doing moderate-intensity sports, fitness or recreational ( <i>leisure</i> ) activities on a typical day?                                                                                                                                                                     | <p>Hours : minutes    <input type="text"/> : <input type="text"/></p> <p>hrs                      mins</p>  | P15<br>(a-b) |
| <b>Sedentary behaviour</b>                                                                                                                                                                                                                                                                                                                          |                                                                                                                                                                                                                                                                                                         |                                                                                                             |              |
| The following question is about sitting or reclining at work, at home, getting to and from places, or with friends including time spent [sitting at a desk, sitting with friends, travelling in car, bus, train, reading, playing cards or watching television], but do not include time spent sleeping.<br><i>[INSERT EXAMPLES] (USE SHOWCARD)</i> |                                                                                                                                                                                                                                                                                                         |                                                                                                             |              |
| 16                                                                                                                                                                                                                                                                                                                                                  | How much time do you usually spend sitting or reclining on a typical day?                                                                                                                                                                                                                               | <p>Hours : minutes    <input type="text"/> : <input type="text"/></p> <p>hrs                      min s</p> | P16<br>(a-b) |

101. \* هل تتعرض للشمس بشكل يومي؟ Do you expose to the sun daily

Mark only one oval.

☐ نعم

YES  
NO

☐ لا

102. \* (إذا كانت الإجابة (نعم) كم دقيقة باليوم؛ وإذا كانت (لا) اكتب 0)

If yes, specify how many minutes daily

\_\_\_\_\_

103. \* هل تتعرض للشمس بشكل أسبوعي؟ Do you expose to the sun weekly

Mark only one oval.

☐ نعم

Yes  
No

☐ لا

104. \* (إذا كانت الإجابة (نعم) كم يوم بالأسبوع؛ وإذا كانت (لا) اختار 0)

If yes, specify how many days per week

Mark only one oval per row.

|            |                       |                       |                       |                       |                       |                       |                       |                       |
|------------|-----------------------|-----------------------|-----------------------|-----------------------|-----------------------|-----------------------|-----------------------|-----------------------|
|            | 0                     | 1                     | 2                     | 3                     | 4                     | 5                     | 6                     | 7                     |
| عدد الأيام | <input type="radio"/> |

105. \* (إذا كانت الإجابة (نعم) كم دقيقة في كل مرة؛ وإذا كانت (لا) اكتب 0)

If yes, specify how many minutes each time

\_\_\_\_\_

106. \* ما هو وقت تعرضك للشمس؟ بإمكانك الخيار أكثر من وقت

Check all that apply.

What is the exposed time? You can choose more than one option

☐ عند الشروق

On the sunrise

☐ عند الظهر

On the Afternoon

☐ قبل الغروب

On the Sunset

107. \* ما هي طبيعة عملك ؟

Nature of work

Mark only one oval.

- ☐ (داخلي (في الغرف أو المناطق المغطاة) Inside
- ☐ (خارجي (تتعرض للشمس بشكل مباشر) Outside

108. \* ما هي أجزاء الجسم الأكثر تعرضاً للشمس ؟

Mark only one oval. What are the most exposed parts of your body?

- ☐ الوجه Face
- ☐ اليدين Hands
- ☐ الوجه واليدين Face and hands
- ☐ الوجه واليدين والقدمين Face, hands and feet

109. \* ما هو مدى تغطية الملابس للجسم أثناء تعرضك للشمس؟

Mark only one oval. How much your clothes cover your body

- ☐ الجسم عدا الوجه واليدين Body except face and hands
- ☐ الجسم عدا الوجه واليدين والرجلين Body except face, hands and feet
- ☐ الجسم عدا الوجه Body except face
- ☐ الجسم بالكامل Whole body
- ☐ الجسم عدا اليدين والرجلين Body except hands and feet

110. \* هل تستخدم كريمات الحماية من الشمس ؟

Mark only one oval. Do you use sunblock?

- ☐ نعم Yes
- ☐ لا No

111. (إذا كانت الإجابة (نعم) ما نوع الكريمات الحماية من الشمس ؟ وإذا كانت الإجابة (لا) اكتب (لا يوجد)

If yes, specify the kind of your sunblock

---

( submit ) شكرا لقد انتهيت من التعبئة أرجو الضغط عل إرسال

## DIET AND NUTRITION SURVEY IN RIYADH CITY

Date of Interview

Participant's Code

□□/□□/□□□□

□□□□

### Saudi Food Frequency Questionnaire

#### 1. Dairy Products: الحليب ومنتجاته

During the past year, on average, how often have you consumed the following, dairy foods? (Please check the appropriate box)

| Code  | Food Item                                                                                              | Per day (times) |     |     |      | Per week |     |      | Per month or Never |                | Measure | Code (office use only) |
|-------|--------------------------------------------------------------------------------------------------------|-----------------|-----|-----|------|----------|-----|------|--------------------|----------------|---------|------------------------|
|       |                                                                                                        | 6+              | 4-5 | 2-3 | once | 5-6      | 2-4 | once | 1-3                | Less than once |         |                        |
| 1.1   | Milk: حليب Or Flavored                                                                                 |                 |     |     |      |          |     |      |                    |                |         |                        |
| 1.1.1 | Whole كامل الدسم                                                                                       |                 |     |     |      |          |     |      |                    |                |         | 1 cup, 240ml           |
| 1.1.2 | Low Fat قليل الدسم                                                                                     |                 |     |     |      |          |     |      |                    |                |         |                        |
| 1.1.3 | Skimmed منزوع الدسم                                                                                    |                 |     |     |      |          |     |      |                    |                |         |                        |
| 1.2   | Laban: لبن                                                                                             |                 |     |     |      |          |     |      |                    |                |         |                        |
| 1.2.1 | Whole كامل الدسم                                                                                       |                 |     |     |      |          |     |      |                    |                |         | 1 cup, 240ml           |
| 1.2.2 | Low Fat قليل الدسم                                                                                     |                 |     |     |      |          |     |      |                    |                |         |                        |
| 1.2.3 | Skimmed منزوع الدسم                                                                                    |                 |     |     |      |          |     |      |                    |                |         |                        |
| 1.3   | Cream Cheese: جبنة الكريمة القابلة للدهن (مثل: المراعي، بوك، كرافت)                                    |                 |     |     |      |          |     |      |                    |                |         |                        |
| 1.3.1 | Whole كامل الدسم                                                                                       |                 |     |     |      |          |     |      |                    |                |         | 1Tbsp, 15g             |
| 1.3.2 | Low Fat قليل الدسم                                                                                     |                 |     |     |      |          |     |      |                    |                |         |                        |
| 1.4   | White cheese (Feta, Mozzarella and Spread Cheeses) الجبنة البيضاء (فيتا، موزاريلا، الجبنة قابلة للدهن) |                 |     |     |      |          |     |      |                    |                |         |                        |
| 1.5   | Cheddar Cheese جبنة التشيدر                                                                            |                 |     |     |      |          |     |      |                    |                |         |                        |
| 1.6   | Yogurt: زبادي/روب (Plain - Flavored with fruits)                                                       |                 |     |     |      |          |     |      |                    |                |         |                        |
| 1.6.1 | Whole كامل الدسم                                                                                       |                 |     |     |      |          |     |      |                    |                |         | 1 can, 170g            |
| 1.6.2 | Low Fat قليل الدسم                                                                                     |                 |     |     |      |          |     |      |                    |                |         |                        |
| 1.6.3 | Skimmed منزوع الدسم                                                                                    |                 |     |     |      |          |     |      |                    |                |         |                        |
| 1.7   | Labnah: لبنه                                                                                           |                 |     |     |      |          |     |      |                    |                |         |                        |
| 1.7.1 | Whole كامل الدسم                                                                                       |                 |     |     |      |          |     |      |                    |                |         | 1Tbsp, 15g             |
| 1.7.2 | Low Fat قليل الدسم                                                                                     |                 |     |     |      |          |     |      |                    |                |         | 1Tbsp, 15g             |
| 1.8   | Ice cream: آيس كريم Full, low, Skimmed                                                                 |                 |     |     |      |          |     |      |                    |                |         | 1 scoop, 33g           |
| 1.9   | Quashta (Cream) /Gaymar قشطة/قيمر شراب الزبادي                                                         |                 |     |     |      |          |     |      |                    |                |         | 1Tbsp, 15g             |
| 1.10  | Yogurt drink Type:.....if applicable                                                                   |                 |     |     |      |          |     |      |                    |                |         | 1 can, 300ml           |
| 1.11  | Paneer جبنة بانير Full, low, Skimmed                                                                   |                 |     |     |      |          |     |      |                    |                |         | 1Tbsp, 15g             |
| 1.12  | Cottage cheese جبنة قريش                                                                               |                 |     |     |      |          |     |      |                    |                |         | 1Tbsp, 15g             |
| 1.13  | Quarg جبنة كريمة Full, low, Skimmed                                                                    |                 |     |     |      |          |     |      |                    |                |         | 1Tbsp, 15g             |
| 1.14  | Sour cream حامضة Full, low, Skimmed                                                                    |                 |     |     |      |          |     |      |                    |                |         | 1Tbsp, 15g             |
| 1.15  | Soy Milk حليب الصويا                                                                                   |                 |     |     |      |          |     |      |                    |                |         | 1Tbsp, 15g             |
| 1.16  | Rice Milk حليب الأرز                                                                                   |                 |     |     |      |          |     |      |                    |                |         | 1 cup, 240ml           |
| 1.17  | Curd مجبر Full, Low, Skimmed                                                                           |                 |     |     |      |          |     |      |                    |                |         | 1Tbsp, 15g             |
| 1.18  | Cream "Non whipped" Full, Low Skimmed                                                                  |                 |     |     |      |          |     |      |                    |                |         | 1 cup, 240ml           |
| 1.19  | Greek Yogurt (plain - flavored) Full, Low, Skimmed                                                     |                 |     |     |      |          |     |      |                    |                |         | 1 can, 170g            |

## 2. Fruits: الفواكه

During the past year, on average, how often have you consumed the following fruits? (please check the appropriate box)

(For seasonal fruits marked \*, please estimate your average use when the fruit is in season)

(للفواكه الموسمية ذات العلامة \*، يرجى تقدير متوسط استهلاكك لها في الموسم)

| Code  | Food Item                                                                               | Per day (times) |     |     |      | Per week |     |      | Per month or Never |                | Measure | Code (office use only) |
|-------|-----------------------------------------------------------------------------------------|-----------------|-----|-----|------|----------|-----|------|--------------------|----------------|---------|------------------------|
|       |                                                                                         | 6+              | 4-5 | 2-3 | once | 5-6      | 2-4 | once | 1-3                | Less than once |         |                        |
| 2.1   | Fresh Fruit Salad سلطة فواكه طازجه                                                      |                 |     |     |      |          |     |      |                    |                |         | 1cup,340ml             |
| 2.2   | Tinned Fruits (all kinds) فواكه معلبه                                                   |                 |     |     |      |          |     |      |                    |                |         | 1 can,425g             |
| 2.3   | Apple تفاح                                                                              |                 |     |     |      |          |     |      |                    |                |         | 1 medium, 180g         |
| 2.4   | Bananas موز                                                                             |                 |     |     |      |          |     |      |                    |                |         | 1 medium, 120g         |
| 2.5   | *Strawberry, raspberries فراولة، توت                                                    |                 |     |     |      |          |     |      |                    |                |         | 1 cup, 212gm           |
| 2.6   | Oranges and Mandarin برتقال، يوسفي                                                      |                 |     |     |      |          |     |      |                    |                |         | 1 medium, 178g         |
| 2.7   | Grapefruit جريب فروت                                                                    |                 |     |     |      |          |     |      |                    |                |         | 1 medium, 178g         |
| 2.8   | Plums, Peaches /Nectarines, or Apricots برقوق، بخاري، خوخ أو مشمش                       |                 |     |     |      |          |     |      |                    |                |         | 2pcs., 70g             |
| 2.9   | Dates: تمر                                                                              |                 |     |     |      |          |     |      |                    |                |         |                        |
| 2.9.1 | Dry dates (Tammer) تمر                                                                  |                 |     |     |      |          |     |      |                    |                |         | 2pcs, 20g              |
| 2.9.2 | Fresh Dates (Ruttab, refriger.) تمر مبرد                                                |                 |     |     |      |          |     |      |                    |                |         | 2pcs,40g               |
| 2.9.3 | *Fresh (Ruttab or Fresh) رطب أو بلح                                                     |                 |     |     |      |          |     |      |                    |                |         | 2pcs, 20g              |
| 2.10  | Pears, Pineapple, Kiwi, Figs, Cherries كمثرى، أناناس، كيوي، تين، كرز                    |                 |     |     |      |          |     |      |                    |                |         | 1 cup, 240g            |
| 2.11  | Grapes عنب                                                                              |                 |     |     |      |          |     |      |                    |                |         | 13pcs,90g              |
| 2.12  | Olives زيتون                                                                            |                 |     |     |      |          |     |      |                    |                |         | 9 medium, 33g          |
| 2.13  | Dried Fruits (e.g. Figs, Apricots, Raisins, Peaches) فواكه مجففه (تين، مشمش، زبيب، خوخ) |                 |     |     |      |          |     |      |                    |                |         | 1 cup, 240g            |
| 2.14  | *Watermelon بطيخ                                                                        |                 |     |     |      |          |     |      |                    |                |         | 1 slice,200g           |
| 2.15  | *Other melons (e.g. Canteloupe, Galia or Honeydew) شمام/بطيخ اصفر                       |                 |     |     |      |          |     |      |                    |                |         | 1 slice,200g           |
| 2.16  | Mango مانجو                                                                             |                 |     |     |      |          |     |      |                    |                |         | 1 medium, 300g         |
| 2.17  | Pomegranate رمان                                                                        |                 |     |     |      |          |     |      |                    |                |         | 1 cup, 186g            |

Please, make sure you have given an answer for every line before leaving this page



### 3. Vegetables: الخضروات

During the past year, on average, how often have you consumed the following vegetables? (please check the appropriate box)

| Code  | Food Item                                                                                                                                          | Per day (times) |     |     |      | Per week |     |      | Per month or Never |                | Measure | Code (office use only) |
|-------|----------------------------------------------------------------------------------------------------------------------------------------------------|-----------------|-----|-----|------|----------|-----|------|--------------------|----------------|---------|------------------------|
|       |                                                                                                                                                    | 6 +             | 4-5 | 2-3 | once | 5-6      | 2-4 | once | 1-3                | Less than once |         |                        |
| 3.1   | <b>Cabbage:</b> ملفوف/كرنب                                                                                                                         |                 |     |     |      |          |     |      |                    |                |         |                        |
| 3.1.1 | Fresh طازج                                                                                                                                         |                 |     |     |      |          |     |      |                    |                |         | 1cup,100g              |
| 3.1.2 | Cooked مطبوخ                                                                                                                                       |                 |     |     |      |          |     |      |                    |                |         | 1 cup,252g             |
| 3.2   | <b>Mixed Vegetable Salad (fresh)</b> سلطة مشكلة                                                                                                    |                 |     |     |      |          |     |      |                    |                |         | 1 cup,234g             |
| 3.3   | <b>Mixed Vegetables (cooked)</b> خضار مشكلة مطبوخة                                                                                                 |                 |     |     |      |          |     |      |                    |                |         |                        |
| 3.4   | <b>Cauliflower, Broccoli or Brussels sprouts (cooked)</b> زهرة، القرنبيط المطبوخ أو كرنب                                                           |                 |     |     |      |          |     |      |                    |                |         | 1 cup, 294g            |
| 3.5   | <b>Tabouleh</b> تبولة                                                                                                                              |                 |     |     |      |          |     |      |                    |                |         | 1cup,234g              |
| 3.6   | <b>Green leafy vegetables (Molokhia &amp; spinach)</b> الورقيات الخضراء (ملوخية، سبانخ) <b>Okra &amp; Green Beans</b> باميا، لوبيا قاصوليا خضراء   |                 |     |     |      |          |     |      |                    |                |         | 1cup, 100g             |
| 3.7   | <b>Peas (cooked)/ (bazelah)</b> بازلاء مطبوخة                                                                                                      |                 |     |     |      |          |     |      |                    |                |         | 1cup,240g              |
| 3.8   | <b>Carrots</b> جزر                                                                                                                                 |                 |     |     |      |          |     |      |                    |                |         | 1 cup, 174g            |
| 3.9   | <b>Tomatoes</b> طماطم                                                                                                                              |                 |     |     |      |          |     |      |                    |                |         | 1 cup, 290g            |
| 3.10  | <b>Mushrooms</b> فطر (مشروم)                                                                                                                       |                 |     |     |      |          |     |      |                    |                |         | 1 cup, 254g            |
| 3.11  | <b>Leeks</b> كراث                                                                                                                                  |                 |     |     |      |          |     |      |                    |                |         | 1 cup, 72g             |
| 3.12  | <b>Cucumber</b> خيار                                                                                                                               |                 |     |     |      |          |     |      |                    |                |         | 1 cup, 194g            |
| 3.13  | <b>Lettuce</b> خس                                                                                                                                  |                 |     |     |      |          |     |      |                    |                |         | 1 cup, 66g             |
| 3.15  | <b>Sweetcorn</b> ذرة                                                                                                                               |                 |     |     |      |          |     |      |                    |                |         | 1 can, 340g            |
| 3.16  | <b>Onion</b> بصل                                                                                                                                   |                 |     |     |      |          |     |      |                    |                |         | 1 cup, 200g            |
| 3.17  | <b>Beans (fava, red, white and Soya beans), lentils, Pigeon, Chick &amp; cow peas) (cooked)</b> فول، عدس، فول الصويا، فاصوليا، حمص (بليلة) فاصوليا |                 |     |     |      |          |     |      |                    |                |         | 1 cup,220g             |
| 3.18  | <b>Baked beans</b> فاصوليا حلوة                                                                                                                    |                 |     |     |      |          |     |      |                    |                |         | 1 cup, 312g            |
| 3.19  | <b>Boiled potatoes</b> بطاطس مطبوخة (مسلوقة)                                                                                                       |                 |     |     |      |          |     |      |                    |                |         | 1 small,96g            |
| 3.20  | <b>Fried potatoes (French fries)</b> بطاطس مقلية (اصابع)                                                                                           |                 |     |     |      |          |     |      |                    |                |         | 1 cup,80g              |
| 3.21  | <b>Potato crisps</b> بطاطس تشيبس (مثل برينقلز أو ليز)                                                                                              |                 |     |     |      |          |     |      |                    |                |         | 1 small pack 26g       |

Please, make sure you have given an answer for every line before leaving this page

#### 4. Meat, Fish and Eggs: لحوم، أسماك وبيض

During the past year, on average, how often have you consumed the following meat, fish, eggs etc.? (please check the appropriate box)

| Code | Food Item                                                                                                                                                      | Per day (times) |     |     |      | Per week |     |      | Per month or Never |                | Measure | Code (office use only) |
|------|----------------------------------------------------------------------------------------------------------------------------------------------------------------|-----------------|-----|-----|------|----------|-----|------|--------------------|----------------|---------|------------------------|
|      |                                                                                                                                                                | 6+              | 4-5 | 2-3 | once | 5-6      | 2-4 | once | 1-3                | Less than once |         |                        |
| 4.1  | Boiled Egg بيض مسلوق                                                                                                                                           |                 |     |     |      |          |     |      |                    |                |         | 1 medium, 60g          |
| 4.2  | Fried eggs, Scrambled eggs or omelets, بيض مقلي، أميلت                                                                                                         |                 |     |     |      |          |     |      |                    |                |         | 1 medium, 60g          |
| 4.3  | Chicken or turkey (boiled, grilled or fried), دجاج، رومي (مسلوق، مشوي، مقلي)                                                                                   |                 |     |     |      |          |     |      |                    |                |         | 60 g                   |
| 4.4  | Lamb or mutton as a mixed dish (e.g. Kabsah, stew, casserole, Spaghetti, lasagne etc. لحم ضأن مضاف، لأطباق مشكله كبسة لحم، إيدام/مرق، سباغيتي ولازانيا باللحم) |                 |     |     |      |          |     |      |                    |                |         | 100g                   |
| 4.5  | Lamb or mutton as a main dish (eg. Steak, roast, in gravy etc.) لحم ضأن طبق أساسي، ستيك، اضلاع مشوي أو في مرق/إيدام                                            |                 |     |     |      |          |     |      |                    |                |         | 180g                   |
| 4.6  | Beef as a or mixed dish (e.g. Kabsah, stew, casserole, Spaghetti, lasagne etc. لحم بقري في طبق متنوع من الحوم البقرية (كبسة، إيدام/مرق، سباغيتي، لازانيا)      |                 |     |     |      |          |     |      |                    |                |         | 100g                   |
| 4.7  | Beef as a main dish (eg. Steak, roast, in gravy etc.) لحم بقري لطبق أساسي ستيك، اضلاع مشوي أو في إيدام/مرق                                                     |                 |     |     |      |          |     |      |                    |                |         | 180g                   |
| 4.8  | Camel Meat لحم جمل                                                                                                                                             |                 |     |     |      |          |     |      |                    |                |         | 100g                   |
| 4.9  | Burgers (beef burger or Chicken Burger) برجر (لحم بقري أو دجاج)                                                                                                |                 |     |     |      |          |     |      |                    |                |         | 90g                    |
| 4.10 | Fried fish سمك مقلي                                                                                                                                            |                 |     |     |      |          |     |      |                    |                |         | 60g                    |
| 4.11 | Grilled or steamed fish سمك مشوي أو سمك بالبخار                                                                                                                |                 |     |     |      |          |     |      |                    |                |         | 60g                    |
| 4.12 | Canned tuna, salmon, mackerel, or sardine تونة معلية سلمون، الإسفري، سردين                                                                                     |                 |     |     |      |          |     |      |                    |                |         | 183g                   |
| 4.13 | Prawn or Shrimps جمبري أو ربيان                                                                                                                                |                 |     |     |      |          |     |      |                    |                |         | 1pcs., 18g             |
| 4.14 | Mussels, oysters, scallops or cockles بلح البحر، المحار، اسكلوب، الصدفيات                                                                                      |                 |     |     |      |          |     |      |                    |                |         | 85g                    |
| 4.15 | Organ meat (liver, brain, heart) Kidney لحوم الأعضاء (كبد، مخ، قلب)                                                                                            |                 |     |     |      |          |     |      |                    |                |         | 100g                   |
| 4.16 | Goat لحم الماعز                                                                                                                                                |                 |     |     |      |          |     |      |                    |                |         | 100g                   |
| 4.17 | White fish سمك أبيض                                                                                                                                            |                 |     |     |      |          |     |      |                    |                |         | 100g                   |
| 4.18 | Tofu                                                                                                                                                           |                 |     |     |      |          |     |      |                    |                |         | 100g                   |
| 4.19 | Pork                                                                                                                                                           |                 |     |     |      |          |     |      |                    |                |         | 100g                   |

Please, make sure you have given an answer for every line before leaving this page

## 5. Mixed Dishes: أطباق مختلطة

During the past year, on average, how often have you consumed the following mixed dishes? (please check the appropriate box)

| Code | Food Item                                                                                      | Per day (times) |     |     |      | Per week |     |      | Per month or Never |                | Measure | Code (office use only) |
|------|------------------------------------------------------------------------------------------------|-----------------|-----|-----|------|----------|-----|------|--------------------|----------------|---------|------------------------|
|      |                                                                                                | 6+              | 4-5 | 2-3 | once | 5-6      | 2-4 | once | 1-3                | Less than once |         |                        |
| 5.1  | Vegetable soup شوربة خضار                                                                      |                 |     |     |      |          |     |      |                    |                |         | 1 cup, 240ml           |
| 5.2  | Chicken soup with cream شوربة الدجاج بالكريمة                                                  |                 |     |     |      |          |     |      |                    |                |         |                        |
| 5.3  | Lentil soup شوربة عدس                                                                          |                 |     |     |      |          |     |      |                    |                |         |                        |
| 5.4  | Oat meal Soup شوربة الشوفان                                                                    |                 |     |     |      |          |     |      |                    |                |         |                        |
| 5.5  | Jareesh (gerish), Marqooq, harees, mataziz, or Qorsan جريش، مرقوق، هريس، مطاطيز، قرصان         |                 |     |     |      |          |     |      |                    |                |         | 1/2plate, 340g         |
| 5.6  | Saleeq سليق/ ارز طافقي                                                                         |                 |     |     |      |          |     |      |                    |                |         |                        |
| 5.7  | Marasia (Marassia) مراصيع                                                                      |                 |     |     |      |          |     |      |                    |                |         | 1/2plate, 60g          |
| 5.8  | Aseeda (Asseda) عصيدة                                                                          |                 |     |     |      |          |     |      |                    |                |         | 1/2plate, 340g         |
| 5.9  | Rice (Kabsah, Beriani, Bukhari or mandi) without meat أرز (كبسة، برياني، بخاري، مندي) بدون لحم |                 |     |     |      |          |     |      |                    |                |         | 1/2 plate, 180g        |
| 5.10 | Rice with Vegetables (Maqloobah) without meat أرز بالخضار (مسلوق) بدون لحم                     |                 |     |     |      |          |     |      |                    |                |         | 1/2 plate, 180g        |
| 5.11 | Kebbah كبه                                                                                     |                 |     |     |      |          |     |      |                    |                |         | 1/2plate, 288g         |
| 5.12 | Mottabaque W/ egg (Muttabagh) مطبق بالبيض                                                      |                 |     |     |      |          |     |      |                    |                |         | 1/2 plate, 120g        |
| 5.13 | Stuffed vegetables (Vine leaves, cabbage, squash) خضراوات محشية ورق عنب، ملفوف، كوسا           |                 |     |     |      |          |     |      |                    |                |         | 1 finger, 15g          |
| 5.14 | Eggplant (aubergine), Zucchini (Marrow) (cooked) (Mussakaah OR Moussaka) باذنجان، كوسة (مصقعه) |                 |     |     |      |          |     |      |                    |                |         | 1/2 plate, 354g        |
| 5.15 | Lasagne لازانيا                                                                                |                 |     |     |      |          |     |      |                    |                |         | 1/2 plate, 470g        |
| 5.16 | Marmite مستخرج الخميرة القابل للدهن kraft vegetarian vegemite                                  |                 |     |     |      |          |     |      |                    |                |         | 1 Tbsp, 15g            |
| 5.17 | Vegetarian meat substitutes (e.g. vegetarian sausage, patties). بدائل اللحم للنباتيين          |                 |     |     |      |          |     |      |                    |                |         |                        |

Please, make sure you have given an answer for every line before leaving this page

| Code | Food Item                                                                                      | Per day (times) |     |     |      | Per week |     |      | Per month or Never |                | Measure | Code (office use only)          |
|------|------------------------------------------------------------------------------------------------|-----------------|-----|-----|------|----------|-----|------|--------------------|----------------|---------|---------------------------------|
|      |                                                                                                | 6 +             | 4-5 | 2-3 | once | 5-6      | 2-4 | once | 1-3                | Less than once |         |                                 |
| 7.1  | <b>Breakfast cereals (corn flakes)</b> رقائق الذرة (كورن فلكس)                                 |                 |     |     |      |          |     |      |                    |                |         | 1cup, 40g                       |
| 7.2  | <b>White bread (Samoli, tabonah, tannor, toast, pita)</b> خبز ابيض (صامولي، تننور، توست، پيتا) |                 |     |     |      |          |     |      |                    |                |         | 1/2 samoli, 1 slice toast, 30 g |
| 7.3  | <b>Brown bread (Samoli, Tabonah, toast, pita)</b> خبز بر (صامولي، توست، تابونا، توست، پيتا)    |                 |     |     |      |          |     |      |                    |                |         | 1/2 samoli, 1 slice toast, 30 g |
| 7.4  | <b>Tamees or Irani bread with sesame</b> تميس او خبز ايراني مع السمسم                          |                 |     |     |      |          |     |      |                    |                |         | 1 slice, 70g                    |
| 7.5  | <b>Pasta spaghetti and Macaroni</b> مكرونه (پاستا، سباغتي)                                     |                 |     |     |      |          |     |      |                    |                |         | 1 cup, 124g                     |
| 7.6  | <b>Dates Biscuits</b> بسكوت بالتمر                                                             |                 |     |     |      |          |     |      |                    |                |         | 1 pcs, 33g                      |
| 7.7  | <b>Other Biscuits and crackers</b> كل أنواع البسكويت                                           |                 |     |     |      |          |     |      |                    |                |         | 1pcs,.9g                        |
| 7.8  | <b>Breakfast cereals with nuts</b> رقائق الإفطار مع المكسرات                                   |                 |     |     |      |          |     |      |                    |                |         | 1cup, 40g                       |
| 7.9  | <b>Bran Flakes</b> رقائق النخالة                                                               |                 |     |     |      |          |     |      |                    |                |         | 1cup, 40g                       |
| 7.10 | <b>Rusks</b> شابورة                                                                            |                 |     |     |      |          |     |      |                    |                |         | Majid Alkhalaf<br>1 slice, 13g  |
| 7.11 | <b>Granola (Plain, Fruits, Nuts)</b>                                                           |                 |     |     |      |          |     |      |                    |                |         | 1cup, 40g                       |

## 8. Beverages, Juices and Drinks: العصائر والمشروبات

During the past year, on average, how often have you consumed the following beverages?

| Code | Food Item                                                                                        | Per day (times) |     |     |      | Per week |     |      | Per month or Never |                | Measure | Code (office use only) |
|------|--------------------------------------------------------------------------------------------------|-----------------|-----|-----|------|----------|-----|------|--------------------|----------------|---------|------------------------|
|      |                                                                                                  | 6+              | 4-5 | 2-3 | once | 5-6      | 2-4 | once | 1-3                | Less than once |         |                        |
| 8.1  | Regular Coffee and Instant coffee (e.g. Nescafe) والقهوة السوداء والتركيبية مثل النسكافيه        |                 |     |     |      |          |     |      |                    |                |         | 1Tbsp, 15gm            |
| 8.2  | Arabic Coffee قهوة عربية                                                                         |                 |     |     |      |          |     |      |                    |                |         | 1 finjal, 30ml         |
| 8.3  | Coffee Whitnesrs e.g. coffee-mate مبيض القهوة (كوفي ميت)                                         |                 |     |     |      |          |     |      |                    |                |         | 1Tbsp, 15gm            |
| 8.4  | Regular fizzy soft drink (e.g. Cola, lemonade, etc.) مشروبات غازية                               |                 |     |     |      |          |     |      |                    |                |         | 1 can, 330ml           |
| 8.5  | Low calorie (diet) fizzy soft drink (e.g. Cola, lemonade, etc.) مشروبات غازية (بدون سكر)         |                 |     |     |      |          |     |      |                    |                |         | 1 can, 330ml           |
| 8.6  | Black Tea شاي اسود                                                                               |                 |     |     |      |          |     |      |                    |                |         | 1 bialah, 60ml         |
| 8.7  | Green Tea شاي اخضر                                                                               |                 |     |     |      |          |     |      |                    |                |         | 1 bialah, 60ml         |
| 8.8  | Fruit squash or cordial المشروبات المضاف لها ماء (تائج أو فيمتو)                                 |                 |     |     |      |          |     |      |                    |                |         | 1Tbsp, 15gm            |
| 8.9  | Hot chocolate/ Cocoa drinks هوت تشوكليت                                                          |                 |     |     |      |          |     |      |                    |                |         | 1 cup, 240ml           |
| 8.10 | Horlicks/Ovaltine/ Nesquik/ Milo بودرة معززة الطعم تضاف للحليب أو الماء الساخن (نسكويك أو مايلو) |                 |     |     |      |          |     |      |                    |                |         | 1Tbsp, 15gm            |
| 8.11 | Mineral water (not in other drinks) مياه الشرب المعبأة أو المياه المعدنية (sehha)                |                 |     |     |      |          |     |      |                    |                |         | 330 ml or 600 ml       |
| 8.12 | Tap water (not in other drinks) ماء الصنبور أو الحنفية                                           |                 |     |     |      |          |     |      |                    |                |         | 1 cup, 240ml           |
| 8.13 | Pure fruit juice (orange, apple, etc.) عصير الفاكهة (برتقال، تفاح أو غيرها)                      |                 |     |     |      |          |     |      |                    |                |         | 1 cup, 240ml           |
| 8.14 | Energy Drinks مشروبات الطاقة                                                                     |                 |     |     |      |          |     |      |                    |                |         | 1 can, 250ml           |

Brands: V energy drink, Red bull, Powerade

Demon. Other Specify:.....

|      |                                                  |  |  |  |  |  |  |  |  |  |  |             |
|------|--------------------------------------------------|--|--|--|--|--|--|--|--|--|--|-------------|
| 8.15 | Powdered Milk Full, Low, Semi Skimmed حليب بودرة |  |  |  |  |  |  |  |  |  |  | 1Tbsp, 15gm |
|------|--------------------------------------------------|--|--|--|--|--|--|--|--|--|--|-------------|

Please, make sure you have given an answer for every line before leaving this page

## 9. Sweets: الحلويات

During the past year, on average, how often have you consumed the following sweet baked goods? (please check the appropriate box)

| Code | Food Item                                          | Per day (times) |     |     |      | Per week |     |      | Per month or Never |                | Measure | Code (office use only) |
|------|----------------------------------------------------|-----------------|-----|-----|------|----------|-----|------|--------------------|----------------|---------|------------------------|
|      |                                                    | 6+              | 4-5 | 2-3 | once | 5-6      | 2-4 | once | 1-3                | Less than once |         |                        |
| 9.1  | Cream caramel كريم كراميل                          |                 |     |     |      |          |     |      |                    |                |         | 1cup, 324g             |
| 9.2  | Halawah Tahinah (Tahini)طحينية                     |                 |     |     |      |          |     |      |                    |                |         | 100g                   |
| 9.3  | Doughnuts دونات                                    |                 |     |     |      |          |     |      |                    |                |         | 1pcs., 60g             |
| 9.4  | Basbousah and Konafah بسبوسة وكنافة                |                 |     |     |      |          |     |      |                    |                |         | 1/2 plate, 124g        |
| 9.5  | Mohallabiah مهلبية                                 |                 |     |     |      |          |     |      |                    |                |         | 100g                   |
| 9.6  | Klijah & Lugimat Al-Ghadi (Lugimat) كليجة و لقيمات |                 |     |     |      |          |     |      |                    |                |         | 34g                    |
| 9.7  | Cake (All) كيك                                     |                 |     |     |      |          |     |      |                    |                |         | 100g                   |
| 9.8  | Arabic sweets Baklava حلويات عربية (بقلاوة)        |                 |     |     |      |          |     |      |                    |                |         | 100g                   |
| 9.9  | Chocolate شكولاته                                  |                 |     |     |      |          |     |      |                    |                |         | 45g                    |
| 9.10 | Honey عسل                                          |                 |     |     |      |          |     |      |                    |                |         | 1Tbsp, 15g             |
| 9.11 | Jam مربى                                           |                 |     |     |      |          |     |      |                    |                |         | 1Tbsp, 15g             |
| 9.12 | Jellies, All Kinds جلى                             |                 |     |     |      |          |     |      |                    |                |         | 1cup, 324g             |
| 9.13 | Sweet Muffins                                      |                 |     |     |      |          |     |      |                    |                |         | 60g                    |
| 9.14 | Cheese Muffins                                     |                 |     |     |      |          |     |      |                    |                |         | 60g                    |
| 9.15 | Cheese Scones                                      |                 |     |     |      |          |     |      |                    |                |         | 60g                    |

## 10. Seeds and Nuts: المكسرات والبذور

During the past year, on average, how often have you consumed the following seeds? (please check the appropriate box)

| Code  | Food Item                                                               | Per day (times) |     |     |      | Per week |     |      | Per month or Never |                | Measure | Code (office use only) |
|-------|-------------------------------------------------------------------------|-----------------|-----|-----|------|----------|-----|------|--------------------|----------------|---------|------------------------|
|       |                                                                         | 6 +             | 4-5 | 2-3 | once | 5-6      | 2-4 | once | 1-3                | Less than once |         |                        |
| 10.1  | Almond اللوز                                                            |                 |     |     |      |          |     |      |                    |                |         | 1cup, 150g             |
| 10.2  | Cashew nuts كاجو/سن العجوز                                              |                 |     |     |      |          |     |      |                    |                |         | 1cup, 150g             |
| 10.3  | Peanut فول سوداني                                                       |                 |     |     |      |          |     |      |                    |                |         | 1cup, 150g             |
| 10.4  | Pistachio فستق                                                          |                 |     |     |      |          |     |      |                    |                |         | 1cup, 110g             |
| 10.5  | Walnut جوز                                                              |                 |     |     |      |          |     |      |                    |                |         | 1cup, 150g             |
| 10.6  | Hazelnuts بندق                                                          |                 |     |     |      |          |     |      |                    |                |         | 1cup, 150g             |
| 10.7  | Pecan nut عين الجمل                                                     |                 |     |     |      |          |     |      |                    |                |         | 1cup, 150g             |
| 10.8  | Chest nut أبو فروه                                                      |                 |     |     |      |          |     |      |                    |                |         | 1cup, 150g             |
| 10.9  | Mixed nuts مكسرات مشكله                                                 |                 |     |     |      |          |     |      |                    |                |         | 1cup, 188g             |
| 10.10 | Seeds (sunflower, melon, sesame seeds) بذور الحبيب، القرع أو دوار الشمس |                 |     |     |      |          |     |      |                    |                |         | 1cup, 110g             |
| 10.11 | Peanut butter زبدة الفول السوداني                                       |                 |     |     |      |          |     |      |                    |                |         | 1Tbsp, 15g             |

Please, make sure you have given an answer for every line before leaving this page

### 11. How often do you eat meals at a fast food/non-fast food restaurant?

في الغالب، ما هو معدل استهلاكك للوجبات الغذائية خارج المنزل سواء من مطاعم الوجبات السريعة أو غيرها؟

| Average Frequency        |                          |                          |                          |                          |                          |                          |                          |                              |                 |
|--------------------------|--------------------------|--------------------------|--------------------------|--------------------------|--------------------------|--------------------------|--------------------------|------------------------------|-----------------|
| Per day (times)          |                          |                          |                          | Per week                 |                          |                          | Per month                |                              | Office use only |
| 6+                       | 4-5                      | 2-3                      | once                     | 5-6                      | 2-4                      | once                     | 1-3                      | Never, less than once/ month |                 |
| <input type="checkbox"/>     |                 |

### 12. Artificial Sweeteners: المحليات الاصطناعية

Do you take Artificial Sweeteners regularly? هل تستخدم المحليات الاصطناعية؟

☐ No لا ☐ Yes نعم

If Yes, what kind (including brand name) and how often do you consume.

إذا كانت الإجابة بنعم، ما هو نوع هذا المحلي الاصطناعي (بما في ذلك الاسم/العلامة التجارية) وكم الكمية المستهلكة في الغالب؟

| Artificial Sweetener |      | Average Frequency |     |     |      |          |     |      |           |                              |                        |
|----------------------|------|-------------------|-----|-----|------|----------|-----|------|-----------|------------------------------|------------------------|
| Name & Brand         | Dose | Per day (times)   |     |     |      | Per week |     |      | Per month |                              | Code (office use only) |
|                      |      | 6+                | 4-5 | 2-3 | once | 5-6      | 2-4 | once | 1-3       | Never, less than once/ month |                        |
|                      |      |                   |     |     |      |          |     |      |           |                              |                        |
|                      |      |                   |     |     |      |          |     |      |           |                              |                        |
|                      |      |                   |     |     |      |          |     |      |           |                              |                        |

### 13. Vitamins and Minerals: الفيتامينات والمعادن

Do you take supplements such as vitamins or minerals regularly?

هل تأخذ المكملات الغذائية مثل الفيتامينات أو المعادن بانتظام؟

☐ No لا ☐ Yes نعم

If Yes, what kind (including brand name) and how often do you consume.

إذا كانت الإجابة بنعم، ما هو نوع المكمل الغذائي (بما في ذلك الاسم/العلامة التجارية) وكم الكمية المستهلكة في الغالب؟

| Supplement   |      | Average Frequency |     |     |      |          |     |      |           |                              |                        |
|--------------|------|-------------------|-----|-----|------|----------|-----|------|-----------|------------------------------|------------------------|
| Name & Brand | Dose | Per day (times)   |     |     |      | Per week |     |      | Per month |                              | Code (office use only) |
|              |      | 6+                | 4-5 | 2-3 | once | 5-6      | 2-4 | once | 1-3       | Never, less than once/ month |                        |
|              |      |                   |     |     |      |          |     |      |           |                              |                        |
|              |      |                   |     |     |      |          |     |      |           |                              |                        |
|              |      |                   |     |     |      |          |     |      |           |                              |                        |
|              |      |                   |     |     |      |          |     |      |           |                              |                        |
|              |      |                   |     |     |      |          |     |      |           |                              |                        |
|              |      |                   |     |     |      |          |     |      |           |                              |                        |
|              |      |                   |     |     |      |          |     |      |           |                              |                        |
|              |      |                   |     |     |      |          |     |      |           |                              |                        |

-Formula / Protein supplements / Protein Bars  
-Multivitamin  
-Vit.D  
-Folic Acid  
-Iron  
-زيت كبد الحوت

هل تأخذين أي أعشاب؟ (يانسون، شمر، حبق، نعناع، زنجبيل.....)  
ما هو نوعه؟  
منذ متى تتناولينها؟

#### 14. Fats, Oils and Sugar: الدهون، الزيوت والسكر

A. Spreads and Oils: (الدهون والزيوت القابلة للدهن، عدا التي تستخدم في الطبخ)

Do you use any butter, margarine or other spread or oil on bread?

هل تستخدم الزبدة، السمن، المارجرين أو الزيوت على الخبز؟

☐ No لا

☐ Yes نعم

If yes, please give full details of the type(s) you use most often?

إذا كانت الإجابة بنعم، يرجى إعطاء التفاصيل الكاملة لأنواع التي تستخدم في معظم الأحيان؟

Office code

|  |  |
|--|--|
|  |  |
|--|--|

|  |  |
|--|--|
|  |  |
|--|--|

|  |  |
|--|--|
|  |  |
|--|--|

|  |  |
|--|--|
|  |  |
|--|--|

If yes, how many teaspoons of butter, margarine or other spread did you use each day on bread?

إذا كان الجواب نعم، كم ملعقة شاي تستخدم يومياً من الزبدة، المارجرين، السمن أو الزيوت الأخرى التي استخدمتها على الخبز؟

|  |  |
|--|--|
|  |  |
|--|--|

B. Sugar: السُكَّر

Do you add sugar on your tea or coffee? هل تقوم بإضافة السكر على الشاي، القهوة، الكون فليكس أو غيرها الخاصة بك؟

☐ No لا

☐ Yes نعم

If yes, what type of sugar you are using? إذا كان الجواب نعم، فما هو نوع السكر المستخدم؟

☐ White سُكَّر أبيض

☐ Brown سُكَّر بُنِّي

☐ Others (غيرها) ..... (include brand names please)

(بما في ذلك الاسم أو العلامة التجارية)

How many teaspoons of table sugar did you use each day in drinks and on cereals or deserts?

إذا كان الجواب نعم، كم من ملعقة شاي من سكر المائدة التي تستخدمها كل يوم في المشروبات، الكون فليكس وغيرها

|  |  |
|--|--|
|  |  |
|--|--|

(If you did not use any table sugar, please enter 0). (إذا كنت لا تستخدم أي كمية من سكر المائدة، من فضلك ضع 0).

C. Salt: ملح الطعام

Do you add Salt to food while cooking? هل تقوم بإضافة الملح إلى طعامك أثناء الطبخ؟

☐ Never لا

☐ Rarely نادراً

☐ Sometimes أحياناً

☐ Usually عادة

☐ Always دائماً

Please, make sure you have given an answer for every line before leaving this page



☐ Never لا ☐ Rarely نادراً ☐ Sometimes أحياناً

☐ Usually عادة ☐ Always دائماً

☐ No لا ☐ Yes نعم

[illegible]
